# Supplementary material
Source: PubMed Central journal article supplement (PMC4216744)
Supplement: NIHMS625826-supplement-1.pdf [file NIHMS625826-supplement-1.pdf]

Table S1. Differential count of bone marrow cells (% of total cell count)

| <b>Differential count</b> | <b>WT</b> | <b>AEG-1KO</b> |
|---------------------------|-----------|----------------|
| Myeloblasts               | 0         | 0              |
| Promyelocytes             | 1         | 1              |
| Myelocytes                | 2         | 2              |
| Metamyelocytes            | 4         | 6              |
| Bands/Segs                | 49        | 46             |
| Eosinophils               | 2         | 1              |
| Basophils                 | 0         | 0              |
| Lymphocytes               | 11        | 7              |
| Plasma cells              | 1         | 1              |
| Monocytes                 | 2         | 3              |
| Erythroids                | 28        | 33             |

Bone marrow was collected from 8 weeks old WT and AEG-1KO mice. Bone marrow smear was made and stained. Two hundred cells were counted to obtain differential count.
