# Supplementary material
Source: PubMed Central journal article supplement (PMC4216744)
Supplement: NIHMS625826-supplement-2.pdf [file NIHMS625826-supplement-2.pdf]

Table S2. Complete blood count of peripheral blood in WT and AEG-1KO mice.

| <b>Parameter</b>                   | <b>WT</b> | <b>AEG-1KO</b> |
|------------------------------------|-----------|----------------|
| Total WBCs ( $X10^3/\mu\text{l}$ ) | 20        | 20             |
| RBCs( $X10^6/\mu\text{l}$ )        | 9.96      | 9.83           |
| Platelets ( $X10^3/\mu\text{l}$ )  | 1,072     | 1,021          |
| Hemoglobin (g/dL)                  | 13.9      | 13.9           |
| HCT (%)                            | 49.9      | 49.8           |
| MCV (fL)                           | 49.5      | 50.7           |

Peripheral blood was collected from WT and AEG-1KO mice and analyzed for complete blood count. WBC: white blood cells; RBC: red blood cells; HCT: hematocrit; MCV: mean corpuscular volume.
