# Supplementary material
Source: PubMed Central journal article supplement (PMC4216744)
Supplement: NIHMS625826-supplement-3.pdf [file NIHMS625826-supplement-3.pdf]

Table S3. Number of liver nodules in DEN-treated WT and AEG-1KO mice.

|                | ID# | Total no. of nodules | <1mm | 1-2mm | 3-5mm | 6-8mm | >8mm |
|----------------|-----|----------------------|------|-------|-------|-------|------|
| <b>WT</b>      | 1   | 12                   | 0    | 12    | 0     | 0     | 0    |
|                | 2   | 91                   | 0    | 91    | 0     | 0     | 0    |
|                | 3   | 92                   | 0    | 0     | 75    | 15    | 2    |
|                | 4   | 10                   | 0    | 8     | 0     | 2     | 0    |
|                | 5   | 49                   | 0    | 46    | 0     | 3     | 0    |
|                | 6   | 56                   | 0    | 0     | 50    | 4     | 2    |
|                | 7   | 8                    | 0    | 6     | 2     | 0     | 0    |
|                | 8   | 15                   | 0    | 0     | 14    | 0     | 1    |
|                | 9   | 10                   | 0    | 0     | 8     | 0     | 2    |
|                | 10  | 16                   | 0    | 14    | 1     | 0     | 1    |
|                | 11  | 14                   | 0    | 0     | 13    | 0     | 1    |
|                | 12  | 23                   | 0    | 21    | 1     | 0     | 1    |
| <b>AEG-1KO</b> | 1   | 0                    | 0    | 0     | 0     | 0     | 0    |
|                | 2   | 5                    | 5    | 0     | 0     | 0     | 0    |
|                | 3   | 8                    | 6    | 0     | 2     | 0     | 0    |
|                | 4   | 0                    | 0    | 0     | 0     | 0     | 0    |
|                | 5   | 10                   | 10   | 0     | 0     | 0     | 0    |
|                | 6   | 0                    | 0    | 0     | 0     | 0     | 0    |
|                | 7   | 2                    | 2    | 0     | 0     | 0     | 0    |
|                | 8   | 2                    | 2    | 0     | 0     | 0     | 0    |
