# Supplementary material
Source: PubMed Central journal article supplement (PMC4216744)
Supplement: NIHMS625826-supplement-4.pdf [file NIHMS625826-supplement-4.pdf]

Table S4. Serum liver enzyme levels 48 h after injection of DEN

|          | AST (IU/L) | ALT (IU/L) | Alk Phos (IU/L) |
|----------|------------|------------|-----------------|
| WT1      | 357        | 104        | 1116            |
| WT2      | 143        | 80         | 792             |
| WT3      | 1080       | 219        | 1380            |
| AEG-1KO1 | 246        | 166        | 706             |
| AEG-1KO2 | 198        | 98         | 571             |
| AEG-1KO3 | 252        | 200        | 626             |
