# Supplementary material
Source: PubMed Central journal article supplement (PMC4216744)
Supplement: NIHMS625826-supplement-5.pdf [file NIHMS625826-supplement-5.pdf]

Table S5. List of differentially expressed genes in the livers of AEG-1KO versus WT mouse.

| Gene      | KO liver | Gene      | WT liver | KO/WT fold change | Log2 fold change |
|-----------|----------|-----------|----------|-------------------|------------------|
| Ccnb1ip1  | 0.308    | Ccnb1ip1  | 0.013    | 23.69230769       | 4.566346823      |
| Aim1l     | 1.106    | Aim1l     | 0.05     | 22.12             | 4.46727948       |
| Sult1e1   | 18.982   | Sult1e1   | 0.859    | 22.09778813       | 4.465830065      |
| A4gnt     | 1.076    | A4gnt     | 0.05     | 21.52             | 4.427606173      |
| Lrrtm3    | 0.107    | Lrrtm3    | 5.11E-03 | 20.94753328       | 4.388708461      |
| Mup10     | 477.968  | Mup10     | 28.656   | 16.67950865       | 4.060004885      |
| Mup9      | 15108.91 | Mup9      | 913.894  | 16.53245234       | 4.047228838      |
| Gm11425   | 0.57     | Gm11425   | 0.04     | 14.25             | 3.832890014      |
| 4933430H1 | 0.136    | 4933430H1 | 9.87E-03 | 13.78192136       | 3.784705126      |
| Lrrc14b   | 0.085    | Lrrc14b   | 7.17E-03 | 11.86322401       | 3.568424232      |
| Cd226     | 0.093    | Cd226     | 7.91E-03 | 11.75429727       | 3.555116385      |
| Gm14680   | 0.399    | Gm14680   | 0.037    | 10.78378378       | 3.430791571      |
| Ano5      | 0.027    | Ano5      | 2.53E-03 | 10.68460625       | 3.417461838      |
| Niacr1    | 0.106    | Niacr1    | 0.01     | 10.6              | 3.40599236       |
| Omd       | 2.49     | Omd       | 0.236    | 10.55084746       | 3.399286978      |
| Kcnj5     | 0.046    | Kcnj5     | 4.38E-03 | 10.511883         | 3.393949218      |
| Sh2d1b1   | 0.144    | Sh2d1b1   | 0.014    | 10.28571429       | 3.362570079      |
| Xlr4a     | 0.628    | Xlr4a     | 0.066    | 9.515151515       | 3.25022663       |
| Gm8842    | 0.205    | Gm8842    | 0.022    | 9.318181818       | 3.220048481      |
| Gpr63     | 0.076    | Gpr63     | 8.30E-03 | 9.154420622       | 3.194468582      |
| Fbxw10    | 0.055    | Fbxw10    | 6.02E-03 | 9.131661962       | 3.190877455      |
| Ear11     | 2.464    | Ear11     | 0.285    | 8.645614035       | 3.111968432      |
| Klra17    | 0.285    | Klra17    | 0.033    | 8.636363636       | 3.11042399       |
| Cyp2b10   | 43.249   | Cyp2b10   | 5.255    | 8.230066603       | 3.040904106      |
| Hao2      | 0.543    | Hao2      | 0.067    | 8.104477612       | 3.018719197      |
| A530064D( | 0.081    | A530064D( | 0.01     | 8.1               | 3.017921908      |
| Cdkn3     | 0.2      | Cdkn3     | 0.025    | 8                 | 3                |
| Amac1     | 0.103    | Amac1     | 0.013    | 7.923076923       | 2.986060809      |
| Cyp3a41a  | 0.075    | Cyp3a41a  | 9.55E-03 | 7.852580882       | 2.973166898      |
| Depdc1b   | 0.061    | Depdc1b   | 7.78E-03 | 7.843641507       | 2.971523599      |
| LOC10003( | 0.028    | LOC10003( | 3.57E-03 | 7.834359261       | 2.969815288      |
| Slc5a3    | 0.014    | Slc5a3    | 1.80E-03 | 7.764836384       | 2.956955525      |
| Slc13a2   | 0.966    | Slc13a2   | 0.126    | 7.666666667       | 2.938599455      |
| Gimap7    | 0.122    | Gimap7    | 0.016    | 7.625             | 2.930737338      |
| Wnt11     | 0.102    | Wnt11     | 0.014    | 7.285714286       | 2.86507042       |
| Lilra6    | 0.351    | Lilra6    | 0.049    | 7.163265306       | 2.840617376      |
| Ccr3      | 0.126    | Ccr3      | 0.018    | 7                 | 2.807354922      |
| Serpinb7  | 0.068    | Serpinb7  | 0.01     | 6.8               | 2.765534746      |
| Usp29     | 0.018    | Usp29     | 2.69E-03 | 6.696428571       | 2.743391863      |
| Lmod2     | 0.735    | Lmod2     | 0.11     | 6.681818182       | 2.740240726      |
| Hist2h2ac | 0.331    | Hist2h2ac | 0.05     | 6.62              | 2.726831217      |
| Sstr3     | 0.099    | Sstr3     | 0.015    | 6.6               | 2.722466024      |
| Fcrl5     | 0.112    | Fcrl5     | 0.017    | 6.588235294       | 2.719892081      |
| Cyp2d12   | 5.084    | Cyp2d12   | 0.775    | 6.56              | 2.713695815      |

|           |          |           |          |             |             |
|-----------|----------|-----------|----------|-------------|-------------|
| Fbxl13    | 0.049    | Fbxl13    | 7.48E-03 | 6.54992648  | 2.711478713 |
| Syt2      | 0.038    | Syt2      | 5.81E-03 | 6.539321976 | 2.709141059 |
| Ccdc154   | 0.053    | Ccdc154   | 8.14E-03 | 6.510256725 | 2.702714436 |
| Frem3     | 0.019    | Frem3     | 2.97E-03 | 6.397306397 | 2.677464582 |
| Lgi2      | 0.121    | Lgi2      | 0.02     | 6.05        | 2.596935142 |
| LOC100503 | 0.137    | LOC100503 | 0.023    | 5.956521739 | 2.574470127 |
| Fam55d    | 0.252    | Fam55d    | 0.043    | 5.860465116 | 2.551015169 |
| Fam110c   | 0.618    | Fam110c   | 0.111    | 5.567567568 | 2.477047162 |
| Ccr1l1    | 0.071    | Ccr1l1    | 0.013    | 5.461538462 | 2.449307401 |
| Slc7a15   | 0.485    | Slc7a15   | 0.089    | 5.449438202 | 2.446107506 |
| Ntrk2     | 4.058    | Ntrk2     | 0.751    | 5.403462051 | 2.433884052 |
| Sh3rf2    | 0.022    | Sh3rf2    | 4.11E-03 | 5.348893752 | 2.419240547 |
| Trpv1     | 0.123    | Trpv1     | 0.023    | 5.347826087 | 2.418952549 |
| Nhs       | 0.018    | Nhs       | 3.38E-03 | 5.333333333 | 2.415037499 |
| Arhgef33  | 0.032    | Arhgef33  | 6.03E-03 | 5.303281405 | 2.406885304 |
| Klhl38    | 0.047    | Klhl38    | 8.90E-03 | 5.283867341 | 2.401594246 |
| Hs6st3    | 0.058    | Hs6st3    | 0.011    | 5.272727273 | 2.398549376 |
| Srd5a2    | 0.725    | Srd5a2    | 0.138    | 5.253623188 | 2.393312728 |
| Ubash3a   | 0.035    | Ubash3a   | 6.66E-03 | 5.252889089 | 2.393111123 |
| Pgr       | 0.015    | Pgr       | 2.86E-03 | 5.25210084  | 2.392894616 |
| Dcc       | 1.00E-02 | Dcc       | 1.91E-03 | 5.243966422 | 2.390658448 |
| Scgb3a1   | 0.173    | Scgb3a1   | 0.033    | 5.242424242 | 2.390234108 |
| Rhd       | 0.068    | Rhd       | 0.013    | 5.230769231 | 2.387023123 |
| Gm7030    | 0.115    | Gm7030    | 0.022    | 5.227272727 | 2.386058432 |
| Adam2     | 0.162    | Adam2     | 0.031    | 5.225806452 | 2.385653692 |
| Xlr4b     | 0.24     | Xlr4b     | 0.046    | 5.217391304 | 2.38332864  |
| Slc24a4   | 0.049    | Slc24a4   | 9.41E-03 | 5.209994684 | 2.3812819   |
| Klk8      | 0.156    | Klk8      | 0.03     | 5.2         | 2.378511623 |
| Gm6710    | 0.027    | Gm6710    | 5.19E-03 | 5.198305737 | 2.378041488 |
| Cntnap4   | 0.021    | Cntnap4   | 4.06E-03 | 5.1762386   | 2.37190412  |
| Scrt2     | 0.03     | Scrt2     | 5.80E-03 | 5.175983437 | 2.371833001 |
| Ms4a14    | 0.028    | Ms4a14    | 5.43E-03 | 5.157487567 | 2.366668438 |
| Rpp25     | 0.077    | Rpp25     | 0.015    | 5.133333333 | 2.359895945 |
| Pcdhb18   | 0.02     | Pcdhb18   | 3.91E-03 | 5.121638924 | 2.356605547 |
| Gm4477    | 2.031    | Gm4477    | 0.402    | 5.052238806 | 2.336922833 |
| Tchh      | 0.771    | Tchh      | 0.155    | 4.974193548 | 2.314462645 |
| H2-Eb2    | 0.084    | H2-Eb2    | 0.017    | 4.941176471 | 2.304854582 |
| Them5     | 0.309    | Them5     | 0.063    | 4.904761905 | 2.294183104 |
| Itgad     | 0.098    | Itgad     | 0.02     | 4.9         | 2.292781749 |
| LOC100862 | 0.16     | LOC100862 | 0.033    | 4.848484848 | 2.277533976 |
| Sertad4   | 0.531    | Sertad4   | 0.11     | 4.827272727 | 2.271208337 |
| Rec8      | 1.017    | Rec8      | 0.211    | 4.819905213 | 2.269004775 |
| 1700019BC | 0.112    | 1700019BC | 0.024    | 4.666666667 | 2.222392421 |
| Cd40lg    | 0.144    | Cd40lg    | 0.031    | 4.64516129  | 2.215728691 |
| Ptprv     | 0.03     | Ptprv     | 6.46E-03 | 4.64180721  | 2.214686604 |
| 2610028H2 | 0.102    | 2610028H2 | 0.022    | 4.636363636 | 2.212993723 |
| Grip1     | 0.05     | Grip1     | 0.011    | 4.545454545 | 2.184424571 |

|           |          |           |          |             |             |
|-----------|----------|-----------|----------|-------------|-------------|
| Kcnk10    | 2.22     | Kcnk10    | 0.489    | 4.539877301 | 2.182653306 |
| Etv4      | 0.077    | Etv4      | 0.017    | 4.529411765 | 2.179323699 |
| Lpar3     | 0.176    | Lpar3     | 0.039    | 4.512820513 | 2.1740294   |
| Tnfaip8l3 | 0.278    | Tnfaip8l3 | 0.062    | 4.483870968 | 2.164744762 |
| Gm8210    | 1.635    | Gm8210    | 0.365    | 4.479452055 | 2.163322267 |
| Gm8909    | 0.513    | Gm8909    | 0.116    | 4.422413793 | 2.14483402  |
| Lcn12     | 0.36     | Lcn12     | 0.082    | 4.390243902 | 2.134301092 |
| Kcng2     | 0.092    | Kcng2     | 0.021    | 4.380952381 | 2.131244533 |
| Mamstr    | 0.118    | Mamstr    | 0.027    | 4.37037037  | 2.127755547 |
| Gstm3     | 55.25    | Gstm3     | 12.768   | 4.327224311 | 2.113441908 |
| Lrrc8b    | 1.135    | Lrrc8b    | 0.263    | 4.315589354 | 2.109557593 |
| Tmeff2    | 0.201    | Tmeff2    | 0.047    | 4.276595745 | 2.09646284  |
| Chrna4    | 0.512    | Chrna4    | 0.12     | 4.266666667 | 2.093109404 |
| Trim40    | 0.153    | Trim40    | 0.036    | 4.25        | 2.087462841 |
| Rgs16     | 34.883   | Rgs16     | 8.216    | 4.245740019 | 2.086016033 |
| D330028D: | 0.16     | D330028D: | 0.038    | 4.210526316 | 2.074000581 |
| Ctsw      | 0.398    | Ctsw      | 0.096    | 4.145833333 | 2.05166212  |
| Cyp2a4    | 86.533   | Cyp2a4    | 21.248   | 4.072524473 | 2.025923368 |
| Gpr31c    | 0.081    | Gpr31c    | 0.02     | 4.05        | 2.017921908 |
| Catsperg2 | 0.02     | Catsperg2 | 4.97E-03 | 4.022526146 | 2.008101798 |
| Ysk4      | 0.02     | Ysk4      | 5.00E-03 | 4.00080016  | 2.000288568 |
| 4933402D2 | 0.088    | 4933402D2 | 0.022    | 4           | 2           |
| Atp1a4    | 0.044    | Atp1a4    | 0.011    | 4           | 2           |
| Ereg      | 0.056    | Ereg      | 0.014    | 4           | 2           |
| Gng8      | 0.084    | Gng8      | 0.021    | 4           | 2           |
| Gsg2      | 0.028    | Gsg2      | 7.00E-03 | 4           | 2           |
| Akr1c21   | 0.064    | Akr1c21   | 0.016    | 4           | 2           |
| Nptxr     | 0.224    | Nptxr     | 0.056    | 4           | 2           |
| Melk      | 0.027    | Melk      | 6.75E-03 | 3.998815166 | 1.999572598 |
| Myo18b    | 0.019    | Myo18b    | 4.75E-03 | 3.997475279 | 1.999089112 |
| Cyp3a41b  | 0.038    | Cyp3a41b  | 9.53E-03 | 3.986153362 | 1.994997217 |
| Nnmt      | 82.865   | Nnmt      | 20.79    | 3.985810486 | 1.994873116 |
| 9930021D1 | 0.155    | 9930021D1 | 0.039    | 3.974358974 | 1.990722186 |
| 2810408A1 | 0.139    | 2810408A1 | 0.035    | 3.971428571 | 1.989658056 |
| Slc29a4   | 0.028    | Slc29a4   | 7.06E-03 | 3.968816442 | 1.988708839 |
| Tnfsf8    | 0.035    | Tnfsf8    | 8.83E-03 | 3.963311063 | 1.986706203 |
| Cryba4    | 0.103    | Cryba4    | 0.026    | 3.961538462 | 1.986060809 |
| Tspyl5    | 0.74     | Tspyl5    | 0.187    | 3.957219251 | 1.984487001 |
| Tmprss5   | 0.038    | Tmprss5   | 9.60E-03 | 3.957096741 | 1.984442336 |
| 1500015O1 | 0.087    | 1500015O1 | 0.022    | 3.954545455 | 1.983511877 |
| Il4i1     | 0.038    | Il4i1     | 9.61E-03 | 3.953391594 | 1.983090865 |
| Kcnq3     | 0.027    | Kcnq3     | 6.84E-03 | 3.949100483 | 1.981524077 |
| Tspan10   | 0.075    | Tspan10   | 0.019    | 3.947368421 | 1.980891177 |
| Efcab4b   | 0.071    | Efcab4b   | 0.018    | 3.944444444 | 1.979822118 |
| Mlf1      | 0.067    | Mlf1      | 0.017    | 3.941176471 | 1.978626349 |
| Grrp1     | 0.063    | Grrp1     | 0.016    | 3.9375      | 1.977279923 |
| Prtg      | 8.83E-03 | Prtg      | 2.25E-03 | 3.934075724 | 1.976024727 |

|           |          |           |          |             |             |
|-----------|----------|-----------|----------|-------------|-------------|
| Unc5d     | 8.40E-03 | Unc5d     | 2.13E-03 | 3.933926898 | 1.975970149 |
| Dnahc3    | 6.29E-03 | Dnahc3    | 1.60E-03 | 3.933667084 | 1.975874864 |
| Chrna7    | 0.037    | Chrna7    | 9.41E-03 | 3.931987248 | 1.975258643 |
| Gm3787    | 0.573    | Gm3787    | 0.146    | 3.924657534 | 1.97256677  |
| Gm5077    | 0.029    | Gm5077    | 7.39E-03 | 3.923690976 | 1.972211421 |
| Gng4      | 0.026    | Gng4      | 6.63E-03 | 3.922160205 | 1.971648465 |
| Il9r      | 0.025    | Il9r      | 6.38E-03 | 3.920953576 | 1.97120456  |
| Nova1     | 0.022    | Nova1     | 5.62E-03 | 3.91319815  | 1.968348165 |
| Dlx4      | 0.043    | Dlx4      | 0.011    | 3.909090909 | 1.966833136 |
| Hist3h2ba | 0.125    | Hist3h2ba | 0.032    | 3.90625     | 1.965784285 |
| Rspo2     | 0.023    | Rspo2     | 5.89E-03 | 3.904260737 | 1.965049403 |
| 1110017F1 | 0.238    | 1110017F1 | 0.061    | 3.901639344 | 1.964080426 |
| Vmn2r1    | 0.028    | Vmn2r1    | 7.18E-03 | 3.897550111 | 1.962567572 |
| Pla2g4c   | 0.022    | Pla2g4c   | 5.65E-03 | 3.896563939 | 1.96220249  |
| Galnt13   | 0.011    | Galnt13   | 2.83E-03 | 3.89380531  | 1.961180751 |
| Dzip1l    | 0.486    | Dzip1l    | 0.125    | 3.888       | 1.959028219 |
| H2-M2     | 0.101    | H2-M2     | 0.026    | 3.884615385 | 1.957771765 |
| Epb4.2    | 0.022    | Epb4.2    | 5.67E-03 | 3.882124581 | 1.956846416 |
| Scd3      | 0.022    | Scd3      | 5.67E-03 | 3.880070547 | 1.956082883 |
| Ky        | 0.014    | Ky        | 3.61E-03 | 3.877042371 | 1.954956502 |
| Psg29     | 0.014    | Psg29     | 3.62E-03 | 3.871681416 | 1.952960244 |
| Rrm2      | 3.74     | Rrm2      | 0.966    | 3.871635611 | 1.952943176 |
| Col28a1   | 0.018    | Col28a1   | 4.65E-03 | 3.869303525 | 1.952073905 |
| Hyal6     | 0.022    | Hyal6     | 5.70E-03 | 3.859649123 | 1.948469699 |
| Tlx2      | 0.054    | Tlx2      | 0.014    | 3.857142857 | 1.94753258  |
| Stox1     | 0.05     | Stox1     | 0.013    | 3.846153846 | 1.943416472 |
| Gapdhs    | 0.627    | Gapdhs    | 0.164    | 3.823170732 | 1.934769628 |
| Aqp4      | 1.878    | Aqp4      | 0.503    | 3.73359841  | 1.900566758 |
| Lrtm1     | 1.766    | Lrtm1     | 0.479    | 3.686847599 | 1.882387782 |
| Zmynd10   | 0.206    | Zmynd10   | 0.056    | 3.678571429 | 1.879145605 |
| Gm4723    | 0.495    | Gm4723    | 0.135    | 3.666666667 | 1.874469118 |
| Aph1c     | 0.154    | Aph1c     | 0.042    | 3.666666667 | 1.874469118 |
| Lmod3     | 0.161    | Lmod3     | 0.044    | 3.659090909 | 1.871485259 |
| Zfp185    | 0.08     | Zfp185    | 0.022    | 3.636363636 | 1.862496476 |
| Cndp1     | 0.228    | Cndp1     | 0.063    | 3.619047619 | 1.855610091 |
| Prss29    | 0.481    | Prss29    | 0.133    | 3.616541353 | 1.854610648 |
| Havcr2    | 0.104    | Havcr2    | 0.029    | 3.586206897 | 1.842458723 |
| Msx1      | 0.147    | Msx1      | 0.041    | 3.585365854 | 1.84212034  |
| Upp2      | 284.694  | Upp2      | 79.466   | 3.58258878  | 1.841002456 |
| Ubxn10    | 0.071    | Ubxn10    | 0.02     | 3.55        | 1.827819025 |
| Ahrr      | 0.06     | Ahrr      | 0.017    | 3.529411765 | 1.819427754 |
| Gm3448    | 0.525    | Gm3448    | 0.15     | 3.5         | 1.807354922 |
| Clec3b    | 0.416    | Clec3b    | 0.119    | 3.495798319 | 1.805621955 |
| Gm3934    | 0.573    | Gm3934    | 0.164    | 3.493902439 | 1.804839324 |
| 1700112E0 | 0.227    | 1700112E0 | 0.065    | 3.492307692 | 1.804180674 |
| Slc26a4   | 0.31     | Slc26a4   | 0.089    | 3.483146067 | 1.800390974 |
| Cd3g      | 0.202    | Cd3g      | 0.058    | 3.482758621 | 1.800230488 |

|           |        |           |          |             |             |
|-----------|--------|-----------|----------|-------------|-------------|
| Xlr3b     | 0.383  | Xlr3b     | 0.11     | 3.481818182 | 1.799840868 |
| E330034G1 | 0.138  | E330034G1 | 0.04     | 3.45        | 1.786596362 |
| Erbp4     | 0.303  | Erbp4     | 0.088    | 3.443181818 | 1.783742365 |
| Mas1      | 0.219  | Mas1      | 0.064    | 3.421875    | 1.77478706  |
| Vpreb3    | 0.557  | Vpreb3    | 0.163    | 3.417177914 | 1.772805363 |
| Tmigd1    | 0.246  | Tmigd1    | 0.072    | 3.416666667 | 1.772589504 |
| Slc43a1   | 5.347  | Slc43a1   | 1.568    | 3.410076531 | 1.769804117 |
| H1fx      | 0.316  | H1fx      | 0.093    | 3.397849462 | 1.764621937 |
| Tnfsf13   | 0.277  | Tnfsf13   | 0.082    | 3.37804878  | 1.756190161 |
| Slpi      | 1.208  | Slpi      | 0.359    | 3.364902507 | 1.750564706 |
| Rgs9bp    | 0.02   | Rgs9bp    | 5.97E-03 | 3.349522693 | 1.743955526 |
| Col17a1   | 0.133  | Col17a1   | 0.04     | 3.325       | 1.733354341 |
| Hamp2     | 5.077  | Hamp2     | 1.531    | 3.316133246 | 1.729501977 |
| Tmppe     | 0.019  | Tmppe     | 5.74E-03 | 3.31010453  | 1.726876777 |
| Gsto2     | 0.185  | Gsto2     | 0.056    | 3.303571429 | 1.724026538 |
| Syt4      | 0.099  | Syt4      | 0.03     | 3.3         | 1.722466024 |
| Eif4ebp3  | 35.238 | Eif4ebp3  | 10.701   | 3.292963274 | 1.719386422 |
| P2ry13    | 0.357  | P2ry13    | 0.109    | 3.275229358 | 1.711595939 |
| Gm5741    | 0.393  | Gm5741    | 0.12     | 3.275       | 1.711494907 |
| Tnni3     | 0.157  | Tnni3     | 0.048    | 3.270833333 | 1.709658248 |
| Spin4     | 0.062  | Spin4     | 0.019    | 3.263157895 | 1.706268797 |
| Mxd3      | 0.199  | Mxd3      | 0.061    | 3.262295082 | 1.705887283 |
| Hpgds     | 0.422  | Hpgds     | 0.131    | 3.221374046 | 1.687676187 |
| Nup210l   | 0.045  | Nup210l   | 0.014    | 3.214285714 | 1.684498174 |
| Zfp459    | 0.077  | Zfp459    | 0.024    | 3.208333333 | 1.68182404  |
| Trim36    | 0.064  | Trim36    | 0.02     | 3.2         | 1.678071905 |
| Accn5     | 35.018 | Accn5     | 11.067   | 3.164181802 | 1.661832494 |
| Prdm8     | 0.041  | Prdm8     | 0.013    | 3.153846154 | 1.657112286 |
| Sirpb1a   | 0.251  | Sirpb1a   | 0.08     | 3.1375      | 1.649615459 |
| Gm14025   | 0.116  | Gm14025   | 0.037    | 3.135135135 | 1.648527629 |
| Adamts3   | 0.047  | Adamts3   | 0.015    | 3.133333333 | 1.647698256 |
| Hey1      | 0.503  | Hey1      | 0.161    | 3.124223602 | 1.643497712 |
| Catsperg1 | 0.137  | Catsperg1 | 0.044    | 3.113636364 | 1.638600464 |
| Kcnmb2    | 0.062  | Kcnmb2    | 0.02     | 3.1         | 1.632268215 |
| Apitd1    | 0.194  | Apitd1    | 0.063    | 3.079365079 | 1.622632919 |
| Greb1     | 0.022  | Greb1     | 7.15E-03 | 3.078645396 | 1.622295705 |
| Gvin1     | 1.493  | Gvin1     | 0.485    | 3.078350515 | 1.622157513 |
| Bex1      | 0.209  | Bex1      | 0.068    | 3.073529412 | 1.619896291 |
| Gm129     | 11.374 | Gm129     | 3.71     | 3.065768194 | 1.616248617 |
| Nrg4      | 2.904  | Nrg4      | 0.949    | 3.060063224 | 1.613561461 |
| Gm6834    | 0.792  | Gm6834    | 0.259    | 3.057915058 | 1.612548332 |
| Hoxb6     | 0.137  | Hoxb6     | 0.045    | 3.044444444 | 1.606178987 |
| Rgs9      | 0.215  | Rgs9      | 0.071    | 3.028169014 | 1.59844573  |
| Tm7sf4    | 0.505  | Tm7sf4    | 0.168    | 3.005952381 | 1.587822155 |
| Cpne9     | 0.084  | Cpne9     | 0.028    | 3           | 1.584962501 |
| Slc39a12  | 0.087  | Slc39a12  | 0.029    | 3           | 1.584962501 |
| Fam78b    | 0.036  | Fam78b    | 0.012    | 3           | 1.584962501 |

|          |          |          |       |             |              |
|----------|----------|----------|-------|-------------|--------------|
| Gm11710  | 0.485    | Gm11710  | 0.162 | 2.99382716  | 1.581990934  |
| Fbxo2    | 0.335    | Fbxo2    | 0.112 | 2.991071429 | 1.580662363  |
| Serpina5 | 0.406    | Serpina5 | 0.137 | 2.96350365  | 1.567303834  |
| Fkbp1b   | 0.237    | Fkbp1b   | 0.08  | 2.9625      | 1.566815154  |
| Gm10349  | 0.502    | Gm10349  | 0.17  | 2.952941176 | 1.562152618  |
| Spn      | 0.297    | Spn      | 0.101 | 2.940594059 | 1.556107638  |
| Mns1     | 0.129    | Mns1     | 0.044 | 2.931818182 | 1.551795637  |
| Fkbp5    | 27.52    | Fkbp5    | 9.424 | 2.920203735 | 1.546069026  |
| Gm1966   | 0.229    | Gm1966   | 0.079 | 2.898734177 | 1.53542304   |
| Dkk4     | 0.647    | Dkk4     | 0.224 | 2.888392857 | 1.53026698   |
| Rdh19    | 0.178    | Rdh19    | 0.062 | 2.870967742 | 1.521537121  |
| Cyp2c55  | 3.917    | Cyp2c55  | 1.365 | 2.86959707  | 1.520848177  |
| Ntf3     | 0.217    | Ntf3     | 0.076 | 2.855263158 | 1.513623719  |
| H2-T3    | 0.154    | H2-T3    | 0.054 | 2.851851852 | 1.511899039  |
| Rnf39    | 10.866   | Rnf39    | 3.837 | 2.831899922 | 1.501770282  |
| Gap43    | 0.138    | Gap43    | 0.391 | 0.352941176 | -1.502500341 |
| Prx      | 0.025    | Prx      | 0.071 | 0.352112676 | -1.50589093  |
| Gprin1   | 0.025    | Gprin1   | 0.071 | 0.352112676 | -1.50589093  |
| Slc14a1  | 0.045    | Slc14a1  | 0.128 | 0.3515625   | -1.508146904 |
| Gm14217  | 0.464    | Gm14217  | 1.326 | 0.349924585 | -1.514884065 |
| Nlrp10   | 0.029    | Nlrp10   | 0.083 | 0.34939759  | -1.517058436 |
| Phospho1 | 2.202    | Phospho1 | 6.305 | 0.34924663  | -1.517681902 |
| Hapln4   | 0.57     | Hapln4   | 1.64  | 0.347560976 | -1.52466199  |
| Ces4a    | 0.732    | Ces4a    | 2.111 | 0.346755092 | -1.528011025 |
| Necab2   | 0.052    | Necab2   | 0.15  | 0.346666667 | -1.528378972 |
| Adam32   | 0.011    | Adam32   | 0.032 | 0.34375     | -1.540568381 |
| Prok1    | 0.686    | Prok1    | 1.996 | 0.343687375 | -1.540831239 |
| Trpm1    | 3.77E-03 | Trpm1    | 0.011 | 0.342545455 | -1.545632654 |
| Gpr160   | 0.07     | Gpr160   | 0.205 | 0.341463415 | -1.550197083 |
| Cyp2s1   | 0.128    | Cyp2s1   | 0.375 | 0.341333333 | -1.550746785 |
| Pole2    | 0.091    | Pole2    | 0.267 | 0.34082397  | -1.552901291 |
| Atp10b   | 3.74E-03 | Atp10b   | 0.011 | 0.339545455 | -1.558323376 |
| Pcdhgb1  | 0.04     | Pcdhgb1  | 0.118 | 0.338983051 | -1.560714954 |
| Lif      | 6.39E-03 | Lif      | 0.019 | 0.336105263 | -1.573014961 |
| Ryr1     | 3.36E-03 | Ryr1     | 0.01  | 0.3359      | -1.573896299 |
| Myocd    | 5.03E-03 | Myocd    | 0.015 | 0.335466667 | -1.575758673 |
| Psat1    | 0.114    | Psat1    | 0.34  | 0.335294118 | -1.576500922 |
| Gata3    | 8.03E-03 | Gata3    | 0.024 | 0.334375    | -1.580461108 |
| Htr2a    | 8.68E-03 | Htr2a    | 0.026 | 0.334       | -1.582079992 |
| Grm4     | 8.67E-03 | Grm4     | 0.026 | 0.333461538 | -1.584407725 |
| Fam54a   | 0.034    | Fam54a   | 0.102 | 0.333333333 | -1.584962501 |
| Pou3f3   | 0.017    | Pou3f3   | 0.051 | 0.333333333 | -1.584962501 |
| Rlbp1    | 0.012    | Rlbp1    | 0.036 | 0.333333333 | -1.584962501 |
| Mgl2     | 0.017    | Mgl2     | 0.051 | 0.333333333 | -1.584962501 |
| Actc1    | 0.019    | Actc1    | 0.057 | 0.333333333 | -1.584962501 |
| Gprc5d   | 0.019    | Gprc5d   | 0.057 | 0.333333333 | -1.584962501 |
| Diras1   | 0.027    | Diras1   | 0.081 | 0.333333333 | -1.584962501 |

|           |          |           |          |             |              |
|-----------|----------|-----------|----------|-------------|--------------|
| 2310007BC | 0.011    | 2310007BC | 0.033    | 0.333333333 | -1.584962501 |
| Arl14     | 0.022    | Arl14     | 0.066    | 0.333333333 | -1.584962501 |
| Gm128     | 0.018    | Gm128     | 0.054    | 0.333333333 | -1.584962501 |
| Bhlha15   | 0.015    | Bhlha15   | 0.045    | 0.333333333 | -1.584962501 |
| Cacng8    | 0.019    | Cacng8    | 0.057    | 0.333333333 | -1.584962501 |
| Glb1l2    | 7.00E-03 | Glb1l2    | 0.021    | 0.333333333 | -1.584962501 |
| Cdh6      | 0.02     | Cdh6      | 0.06     | 0.333333333 | -1.584962501 |
| Prph      | 0.028    | Prph      | 0.084    | 0.333333333 | -1.584962501 |
| 1700055NC | 0.013    | 1700055NC | 0.039    | 0.333333333 | -1.584962501 |
| 4932425I2 | 9.33E-03 | 4932425I2 | 0.028    | 0.33325     | -1.58532322  |
| Crybb3    | 0.53     | Crybb3    | 1.592    | 0.332914573 | -1.586776071 |
| Hspb7     | 9.32E-03 | Hspb7     | 0.028    | 0.332892857 | -1.58687018  |
| Capn8     | 1.414    | Capn8     | 4.249    | 0.332784185 | -1.587341224 |
| En2       | 7.29E-03 | En2       | 0.022    | 0.331545455 | -1.592721419 |
| Prdm6     | 9.92E-03 | Prdm6     | 0.03     | 0.330633333 | -1.596695915 |
| Pmfbbp1   | 7.59E-03 | Pmfbbp1   | 0.023    | 0.330130435 | -1.598891948 |
| Zfp296    | 0.034    | Zfp296    | 0.103    | 0.330097087 | -1.599037686 |
| Gm15583   | 6.60E-03 | Gm15583   | 0.02     | 0.32995     | -1.599680677 |
| 1700019L0 | 0.031    | 1700019L0 | 0.094    | 0.329787234 | -1.600392541 |
| Klri1     | 0.031    | Klri1     | 0.094    | 0.329787234 | -1.600392541 |
| Klri2     | 6.59E-03 | Klri2     | 0.02     | 0.3297      | -1.600774208 |
| Gm13304   | 0.03     | Gm13304   | 0.091    | 0.32967033  | -1.600904045 |
| BC049762  | 0.088    | BC049762  | 0.267    | 0.329588015 | -1.601264313 |
| Dusp9     | 9.56E-03 | Dusp9     | 0.029    | 0.329517241 | -1.601574141 |
| Edaradd   | 9.55E-03 | Edaradd   | 0.029    | 0.32937931  | -1.602178159 |
| Ush1c     | 8.23E-03 | Ush1c     | 0.025    | 0.3292      | -1.602963759 |
| Tas2r138  | 0.052    | Tas2r138  | 0.158    | 0.329113924 | -1.60334103  |
| 4732415M  | 0.05     | 4732415M  | 0.152    | 0.328947368 | -1.604071324 |
| Sox10     | 9.51E-03 | Sox10     | 0.029    | 0.327931034 | -1.608535654 |
| Mettl21d  | 1.181    | Mettl21d  | 3.602    | 0.327873404 | -1.608789217 |
| Scn5a     | 3.02E-03 | Scn5a     | 9.21E-03 | 0.327867072 | -1.608817077 |
| Fbn2      | 2.46E-03 | Fbn2      | 7.51E-03 | 0.327829561 | -1.608982146 |
| Ptchd2    | 2.97E-03 | Ptchd2    | 9.06E-03 | 0.327776551 | -1.609215446 |
| Pvalb     | 0.057    | Pvalb     | 0.174    | 0.327586207 | -1.610053482 |
| Gm5150    | 0.113    | Gm5150    | 0.345    | 0.327536232 | -1.610273589 |
| Slc26a8   | 8.52E-03 | Slc26a8   | 0.026    | 0.3275      | -1.610433188 |
| Tmem45b   | 0.131    | Tmem45b   | 0.4      | 0.3275      | -1.610433188 |
| Ltb4r1    | 0.111    | Ltb4r1    | 0.339    | 0.327433628 | -1.610725597 |
| Lin7b     | 0.036    | Lin7b     | 0.11     | 0.327272727 | -1.611434712 |
| Mctp1     | 0.018    | Mctp1     | 0.055    | 0.327272727 | -1.611434712 |
| Fam150b   | 0.017    | Fam150b   | 0.052    | 0.326923077 | -1.612976877 |
| BC048609  | 0.048    | BC048609  | 0.147    | 0.326530612 | -1.614709844 |
| Foxc2     | 9.47E-03 | Foxc2     | 0.029    | 0.326482759 | -1.614921289 |
| Slc5a5    | 8.81E-03 | Slc5a5    | 0.027    | 0.32637037  | -1.615418007 |
| Sidt1     | 0.03     | Sidt1     | 0.092    | 0.326086957 | -1.61667136  |
| Scn4a     | 7.82E-03 | Scn4a     | 0.024    | 0.325875    | -1.617609417 |
| Zdhhc15   | 0.014    | Zdhhc15   | 0.043    | 0.325581395 | -1.618909833 |

|            |          |            |          |             |              |
|------------|----------|------------|----------|-------------|--------------|
| Fam181b    | 0.014    | Fam181b    | 0.043    | 0.325581395 | -1.618909833 |
| Cyp4a31    | 1.923    | Cyp4a31    | 5.913    | 0.325215627 | -1.620531514 |
| Tubb2b     | 0.04     | Tubb2b     | 0.123    | 0.325203252 | -1.62058641  |
| Scel       | 8.45E-03 | Scel       | 0.026    | 0.325038462 | -1.621317654 |
| Pcdhb3     | 6.81E-03 | Pcdhb3     | 0.021    | 0.324428571 | -1.624027216 |
| Prom2      | 0.012    | Prom2      | 0.037    | 0.324324324 | -1.624490865 |
| Slc25a31   | 0.012    | Slc25a31   | 0.037    | 0.324324324 | -1.624490865 |
| Doc2b      | 0.012    | Doc2b      | 0.037    | 0.324324324 | -1.624490865 |
| Pcdhb6     | 0.011    | Pcdhb6     | 0.034    | 0.323529412 | -1.628031223 |
| Mtus2      | 0.055    | Mtus2      | 0.17     | 0.323529412 | -1.628031223 |
| Tmem145    | 0.022    | Tmem145    | 0.068    | 0.323529412 | -1.628031223 |
| Gm9631     | 8.41E-03 | Gm9631     | 0.026    | 0.323346154 | -1.628848645 |
| Klk1b22    | 0.032    | Klk1b22    | 0.099    | 0.323232323 | -1.62935662  |
| Lrrc26     | 0.021    | Lrrc26     | 0.065    | 0.323076923 | -1.63005039  |
| Wdr38      | 0.021    | Wdr38      | 0.065    | 0.323076923 | -1.63005039  |
| Kdm4d      | 9.69E-03 | Kdm4d      | 0.03     | 0.323066667 | -1.630096191 |
| Slc41a2    | 1.347    | Slc41a2    | 4.172    | 0.322866731 | -1.630989307 |
| Ccdc108    | 4.51E-03 | Ccdc108    | 0.014    | 0.322285714 | -1.633587854 |
| Tmem91     | 0.029    | Tmem91     | 0.09     | 0.322222222 | -1.633872101 |
| Gzma       | 0.029    | Gzma       | 0.09     | 0.322222222 | -1.633872101 |
| Utp14b     | 0.019    | Utp14b     | 0.059    | 0.322033898 | -1.634715536 |
| Maneal     | 0.028    | Maneal     | 0.087    | 0.32183908  | -1.635588574 |
| Serpina10- | 7.39E-03 | Serpina10- | 0.023    | 0.321434783 | -1.637402043 |
| Rsph4a     | 7.07E-03 | Rsph4a     | 0.022    | 0.321318182 | -1.637925477 |
| Dpysl5     | 5.14E-03 | Dpysl5     | 0.016    | 0.3211875   | -1.638512348 |
| Galnt9     | 0.017    | Galnt9     | 0.053    | 0.320754717 | -1.640457613 |
| Sp6        | 0.015    | Sp6        | 0.047    | 0.319148936 | -1.647698256 |
| Cacna2d4   | 4.45E-03 | Cacna2d4   | 0.014    | 0.317571429 | -1.654846974 |
| Gal3st1    | 0.152    | Gal3st1    | 0.482    | 0.315352697 | -1.664961823 |
| Acta2      | 1.218    | Acta2      | 3.891    | 0.313030069 | -1.675626847 |
| Serpina7   | 4.615    | Serpina7   | 14.755   | 0.31277533  | -1.676801368 |
| Slc35f1    | 0.01     | Slc35f1    | 0.032    | 0.3125      | -1.678071905 |
| Umod       | 0.01     | Umod       | 0.032    | 0.3125      | -1.678071905 |
| Mup20      | 2420.714 | Mup20      | 7782.698 | 0.311037895 | -1.684837736 |
| Cfd        | 0.112    | Cfd        | 0.362    | 0.309392265 | -1.692490965 |
| Dlgap5     | 0.017    | Dlgap5     | 0.055    | 0.309090909 | -1.693896872 |
| Cldn7      | 0.142    | Cldn7      | 0.46     | 0.308695652 | -1.695742931 |
| Fhdc1      | 0.025    | Fhdc1      | 0.081    | 0.308641975 | -1.695993813 |
| Cyp2c65    | 0.053    | Cyp2c65    | 0.172    | 0.308139535 | -1.6983443   |
| Barhl1     | 0.028    | Barhl1     | 0.091    | 0.307692308 | -1.700439718 |
| Mboat1     | 0.063    | Mboat1     | 0.205    | 0.307317073 | -1.702200176 |
| Slc1a1     | 0.083    | Slc1a1     | 0.271    | 0.306273063 | -1.70710961  |
| Hist1h2ac  | 0.041    | Hist1h2ac  | 0.134    | 0.305970149 | -1.708537186 |
| Ckmt1      | 0.26     | Ckmt1      | 0.854    | 0.304449649 | -1.715724447 |
| Mt1        | 105.059  | Mt1        | 345.745  | 0.303862673 | -1.718508631 |
| Camk2n2    | 0.121    | Camk2n2    | 0.399    | 0.303258145 | -1.721381699 |
| Oscp1      | 0.036    | Oscp1      | 0.119    | 0.302521008 | -1.724892762 |



|           |          |           |          |             |              |
|-----------|----------|-----------|----------|-------------|--------------|
| Gm12693   | 0.117    | Gm12693   | 0.387    | 0.302325581 | -1.725825037 |
| Ptger4    | 0.026    | Ptger4    | 0.086    | 0.302325581 | -1.725825037 |
| Unc13b    | 0.597    | Unc13b    | 1.98     | 0.301515152 | -1.729697594 |
| Kif26b    | 0.056    | Kif26b    | 0.186    | 0.301075269 | -1.731803889 |
| 2610305D1 | 0.208    | 2610305D1 | 0.694    | 0.299711816 | -1.738352134 |
| Pcdhgb6   | 0.044    | Pcdhgb6   | 0.147    | 0.299319728 | -1.740240726 |
| Grm2      | 0.023    | Grm2      | 0.077    | 0.298701299 | -1.743224585 |
| Tmsb15b1  | 0.294    | Tmsb15b1  | 0.986    | 0.298174442 | -1.745771492 |
| Adra1d    | 0.022    | Adra1d    | 0.074    | 0.297297297 | -1.750021747 |
| Tagln3    | 0.155    | Tagln3    | 0.524    | 0.295801527 | -1.757298596 |
| Ccdc160   | 0.034    | Ccdc160   | 0.115    | 0.295652174 | -1.75802721  |
| Shd       | 0.034    | Shd       | 0.115    | 0.295652174 | -1.75802721  |
| Chi3l1    | 0.031    | Chi3l1    | 0.105    | 0.295238095 | -1.760049207 |
| Cdcp1     | 0.315    | Cdcp1     | 1.068    | 0.29494382  | -1.761487913 |
| Folh1     | 0.017    | Folh1     | 0.058    | 0.293103448 | -1.770518154 |
| Elovl4    | 0.017    | Elovl4    | 0.058    | 0.293103448 | -1.770518154 |
| Wnt7b     | 0.018    | Wnt7b     | 0.062    | 0.290322581 | -1.784271309 |
| Rab3b     | 0.031    | Rab3b     | 0.107    | 0.289719626 | -1.787270676 |
| Fxyd6     | 0.288    | Fxyd6     | 1.01     | 0.285148515 | -1.810214576 |
| Gm10294   | 2.788    | Gm10294   | 9.823    | 0.283823679 | -1.816933138 |
| Cyp2c40   | 0.817    | Cyp2c40   | 2.917    | 0.280082276 | -1.836077403 |
| Micalcl   | 0.172    | Micalcl   | 0.616    | 0.279220779 | -1.840521786 |
| Clic6     | 0.041    | Clic6     | 0.147    | 0.278911565 | -1.84212034  |
| Fam69b    | 0.064    | Fam69b    | 0.23     | 0.27826087  | -1.845490051 |
| Klf5      | 0.06     | Klf5      | 0.216    | 0.277777778 | -1.847996907 |
| Akap6     | 0.033    | Akap6     | 0.119    | 0.277310924 | -1.850423644 |
| Grin2c    | 0.021    | Grin2c    | 0.076    | 0.276315789 | -1.855610091 |
| Pou2af1   | 0.09     | Pou2af1   | 0.33     | 0.272727273 | -1.874469118 |
| Cdh15     | 0.045    | Cdh15     | 0.166    | 0.271084337 | -1.883186335 |
| Sync      | 0.013    | Sync      | 0.048    | 0.270833333 | -1.884522783 |
| Sorl1     | 0.428    | Sorl1     | 1.597    | 0.268002505 | -1.899681611 |
| BC016579  | 0.012    | BC016579  | 0.045    | 0.266666667 | -1.906890596 |
| Cd96      | 0.012    | Cd96      | 0.045    | 0.266666667 | -1.906890596 |
| Spata17   | 0.016    | Spata17   | 0.06     | 0.266666667 | -1.906890596 |
| Ccdc109b  | 0.02     | Ccdc109b  | 0.075    | 0.266666667 | -1.906890596 |
| Slc7a11   | 5.59E-03 | Slc7a11   | 0.021    | 0.266285714 | -1.908953062 |
| Gdf9      | 0.029    | Gdf9      | 0.109    | 0.266055046 | -1.91020333  |
| Ism1      | 8.76E-03 | Ism1      | 0.033    | 0.265575758 | -1.912804635 |
| Patl2     | 0.032    | Patl2     | 0.121    | 0.26446281  | -1.918863237 |
| 4931440L1 | 0.019    | 4931440L1 | 0.072    | 0.263888889 | -1.921997488 |
| Hist1h4b  | 0.083    | Hist1h4b  | 0.315    | 0.263492063 | -1.924168587 |
| Eps8l3    | 0.114    | Eps8l3    | 0.433    | 0.263279446 | -1.925333201 |
| Adarb2    | 4.73E-03 | Adarb2    | 0.018    | 0.262722222 | -1.92838986  |
| Gm22      | 2.05E-03 | Gm22      | 7.82E-03 | 0.2622154   | -1.931175675 |
| Scube3    | 8.65E-03 | Scube3    | 0.033    | 0.262181818 | -1.931360454 |
| Ng23      | 0.027    | Ng23      | 0.103    | 0.262135922 | -1.931613025 |
| Myoz3     | 7.60E-03 | Myoz3     | 0.029    | 0.261896552 | -1.93293103  |

|           |          |           |          |             |              |
|-----------|----------|-----------|----------|-------------|--------------|
| Hist1h2ao | 0.05     | Hist1h2ao | 0.191    | 0.261780105 | -1.933572638 |
| Pomc      | 0.051    | Pomc      | 0.195    | 0.261538462 | -1.934904972 |
| Zfp575    | 9.41E-03 | Zfp575    | 0.036    | 0.261472222 | -1.935270407 |
| Cpne8     | 0.375    | Cpne8     | 1.435    | 0.261324042 | -1.936088236 |
| 1700003F1 | 0.035    | 1700003F1 | 0.134    | 0.26119403  | -1.936806174 |
| 1700088E0 | 0.082    | 1700088E0 | 0.314    | 0.261146497 | -1.937068744 |
| Ifitm6    | 0.095    | Ifitm6    | 0.364    | 0.260989011 | -1.937939032 |
| Ccl11     | 0.024    | Ccl11     | 0.092    | 0.260869565 | -1.938599455 |
| Sh3gl3    | 0.018    | Sh3gl3    | 0.069    | 0.260869565 | -1.938599455 |
| Mmp13     | 9.65E-03 | Mmp13     | 0.037    | 0.260675676 | -1.939672127 |
| Gm10651   | 0.042    | Gm10651   | 0.162    | 0.259259259 | -1.94753258  |
| Apoa4     | 529.159  | Apoa4     | 2048.509 | 0.258314218 | -1.952801042 |
| Cd209a    | 0.017    | Cd209a    | 0.066    | 0.257575758 | -1.956931278 |
| Tm4sf5    | 0.026    | Tm4sf5    | 0.101    | 0.257425743 | -1.957771765 |
| Gpr55     | 0.01     | Gpr55     | 0.039    | 0.256410256 | -1.963474124 |
| Pitx3     | 0.168    | Pitx3     | 0.656    | 0.256097561 | -1.965234582 |
| Cdr1      | 0.011    | Cdr1      | 0.043    | 0.255813953 | -1.966833136 |
| BC055004  | 0.011    | BC055004  | 0.043    | 0.255813953 | -1.966833136 |
| Evi2a     | 0.011    | Evi2a     | 0.043    | 0.255813953 | -1.966833136 |
| Slc34a2   | 0.056    | Slc34a2   | 0.222    | 0.252252252 | -1.987060944 |
| Dok7      | 0.01     | Dok7      | 0.04     | 0.25        | -2           |
| Cyp4a10   | 39.01    | Cyp4a10   | 156.285  | 0.249608088 | -2.002263414 |
| Flnc      | 8.44E-03 | Flnc      | 0.034    | 0.248352941 | -2.009536263 |
| Sarm1     | 0.03     | Sarm1     | 0.122    | 0.245901639 | -2.023846742 |
| 2010015L0 | 0.028    | 2010015L0 | 0.114    | 0.245614035 | -2.025535092 |
| 9930023K0 | 0.022    | 9930023K0 | 0.091    | 0.241758242 | -2.048363022 |
| Arntl     | 0.435    | Arntl     | 1.8      | 0.241666667 | -2.0489096   |
| Car12     | 0.014    | Car12     | 0.058    | 0.24137931  | -2.050626073 |
| Col8a2    | 0.012    | Col8a2    | 0.05     | 0.24        | -2.058893689 |
| Lgals2    | 0.174    | Lgals2    | 0.731    | 0.238030096 | -2.0707841   |
| Hrh3      | 0.021    | Hrh3      | 0.089    | 0.235955056 | -2.083416008 |
| Treh      | 1.087    | Treh      | 4.644    | 0.234065461 | -2.095016032 |
| Muc13     | 0.017    | Muc13     | 0.073    | 0.232876712 | -2.102361718 |
| Crhr2     | 0.019    | Crhr2     | 0.082    | 0.231707317 | -2.109624491 |
| Trim34b   | 0.101    | Trim34b   | 0.436    | 0.231651376 | -2.109972842 |
| Rab25     | 0.073    | Rab25     | 0.316    | 0.231012658 | -2.113956189 |
| Cd24a     | 0.426    | Cd24a     | 1.853    | 0.229897464 | -2.120937546 |
| Efs       | 0.014    | Efs       | 0.061    | 0.229508197 | -2.123382416 |
| Vnn1      | 6.642    | Vnn1      | 29.465   | 0.22541999  | -2.149312638 |
| Hoxa5     | 0.014    | Hoxa5     | 0.063    | 0.222222222 | -2.169925001 |
| Me3       | 0.012    | Me3       | 0.054    | 0.222222222 | -2.169925001 |
| Xylt1     | 8.40E-03 | Xylt1     | 0.038    | 0.221157895 | -2.176851351 |
| 1700020L2 | 0.028    | 1700020L2 | 0.127    | 0.220472441 | -2.181329765 |
| Sprr2a2   | 7.27E-03 | Sprr2a2   | 0.033    | 0.220424242 | -2.181645194 |
| Slc22a26  | 0.026    | Slc22a26  | 0.118    | 0.220338983 | -2.182203331 |
| 4933408B1 | 0.011    | 4933408B1 | 0.05     | 0.22        | -2.184424571 |
| Creb5     | 8.98E-03 | Creb5     | 0.041    | 0.21902439  | -2.19083656  |

|            |          |            |         |             |              |
|------------|----------|------------|---------|-------------|--------------|
| Meig1      | 0.073    | Meig1      | 0.334   | 0.218562874 | -2.193879734 |
| Lcn13      | 5.175    | Lcn13      | 23.705  | 0.218308374 | -2.195560625 |
| Timp1      | 0.029    | Timp1      | 0.133   | 0.218045113 | -2.19730144  |
| 1810041L1  | 8.72E-03 | 1810041L1  | 0.04    | 0.218025    | -2.197434523 |
| Zmynd12    | 0.017    | Zmynd12    | 0.078   | 0.217948718 | -2.197939378 |
| Xrra1      | 9.81E-03 | Xrra1      | 0.045   | 0.217911111 | -2.198188335 |
| BC060267   | 0.01     | BC060267   | 0.046   | 0.217391304 | -2.201633861 |
| Capn12     | 9.12E-03 | Capn12     | 0.042   | 0.217214286 | -2.202809106 |
| Kndc1      | 0.011    | Kndc1      | 0.051   | 0.215686275 | -2.212993723 |
| Gm14085    | 6.90E-03 | Gm14085    | 0.032   | 0.21559375  | -2.213612739 |
| Cnn1       | 0.104    | Cnn1       | 0.485   | 0.21443299  | -2.221401219 |
| Gli2       | 3.85E-03 | Gli2       | 0.018   | 0.213666667 | -2.226566239 |
| Sla2       | 0.01     | Sla2       | 0.047   | 0.212765957 | -2.232660757 |
| 4930452BC  | 0.216    | 4930452BC  | 1.016   | 0.212598425 | -2.233797185 |
| F630043AC  | 0.011    | F630043AC  | 0.052   | 0.211538462 | -2.2410081   |
| Saa3       | 2.575    | Saa3       | 12.191  | 0.211221393 | -2.243172134 |
| Prr11      | 0.013    | Prr11      | 0.062   | 0.209677419 | -2.253756592 |
| Derl3      | 1.101    | Derl3      | 5.258   | 0.209395207 | -2.255699673 |
| Tmem163    | 0.031    | Tmem163    | 0.149   | 0.208053691 | -2.26497221  |
| Cadm2      | 0.011    | Cadm2      | 0.053   | 0.20754717  | -2.268488836 |
| 1810062G1  | 0.085    | 1810062G1  | 0.41    | 0.207317073 | -2.270089163 |
| Moxd1      | 1.598    | Moxd1      | 7.901   | 0.202252879 | -2.305767853 |
| Lgals1     | 2.258    | Lgals1     | 11.338  | 0.19915329  | -2.328048783 |
| Kdelr3     | 0.036    | Kdelr3     | 0.181   | 0.198895028 | -2.329920886 |
| Cd300lh    | 0.28     | Cd300lh    | 1.413   | 0.198159943 | -2.335262733 |
| B4galnt2   | 0.057    | B4galnt2   | 0.289   | 0.197231834 | -2.342035668 |
| Cdh22      | 0.014    | Cdh22      | 0.071   | 0.197183099 | -2.342392197 |
| Pcdhga5    | 0.011    | Pcdhga5    | 0.056   | 0.196428571 | -2.347923303 |
| Fut9       | 6.46E-03 | Fut9       | 0.033   | 0.195636364 | -2.353753541 |
| Mmd2       | 0.397    | Mmd2       | 2.053   | 0.193375548 | -2.370522715 |
| Rims1 (NC_ | 0.014    | Rims1 (NC_ | 0.073   | 0.191780822 | -2.382469637 |
| Dscam      | 3.45E-03 | Dscam      | 0.018   | 0.191611111 | -2.383746873 |
| Mt2        | 34.339   | Mt2        | 179.525 | 0.191276981 | -2.386264831 |
| Krt19      | 0.432    | Krt19      | 2.261   | 0.1910659   | -2.387857775 |
| A2m        | 5.52E-03 | A2m        | 0.029   | 0.190482759 | -2.392267676 |
| Fam83e     | 0.027    | Fam83e     | 0.142   | 0.190140845 | -2.394859617 |
| Grik4      | 7.40E-03 | Grik4      | 0.039   | 0.189666667 | -2.398461943 |
| 4930415O2  | 0.046    | 4930415O2  | 0.243   | 0.189300412 | -2.401250548 |
| Pnck       | 0.031    | Pnck       | 0.164   | 0.18902439  | -2.403355694 |
| Pcdhb12    | 8.50E-03 | Pcdhb12    | 0.045   | 0.188977778 | -2.403711499 |
| St6galnac5 | 0.013    | St6galnac5 | 0.069   | 0.188405797 | -2.408084739 |
| A330021E2  | 0.016    | A330021E2  | 0.085   | 0.188235294 | -2.409390936 |
| BC048546   | 0.181    | BC048546   | 0.963   | 0.187954309 | -2.411546101 |
| Nell1      | 9.18E-03 | Nell1      | 0.049   | 0.187244898 | -2.417001686 |
| Fxyd7      | 0.038    | Fxyd7      | 0.203   | 0.187192118 | -2.417408404 |
| Zbtb8b     | 7.85E-03 | Zbtb8b     | 0.042   | 0.186833333 | -2.420176223 |
| Entpd3     | 7.47E-03 | Entpd3     | 0.04    | 0.1868      | -2.42043364  |

|           |          |           |         |             |              |
|-----------|----------|-----------|---------|-------------|--------------|
| Fzd6      | 0.28     | Fzd6      | 1.502   | 0.186418109 | -2.423386081 |
| Zbtb7c    | 0.113    | Zbtb7c    | 0.607   | 0.18616145  | -2.425373744 |
| Abcc8     | 5.21E-03 | Abcc8     | 0.028   | 0.186071429 | -2.42607155  |
| Spata3    | 0.016    | Spata3    | 0.086   | 0.186046512 | -2.426264755 |
| Ret       | 3.52E-03 | Ret       | 0.019   | 0.185       | -2.434402824 |
| Fgf21     | 1.362    | Fgf21     | 7.376   | 0.184652928 | -2.437111952 |
| Sdcbp2    | 0.056    | Sdcbp2    | 0.313   | 0.178913738 | -2.482663925 |
| A630081J0 | 0.013    | A630081J0 | 0.076   | 0.171052632 | -2.547487795 |
| Vmn2r29   | 0.03     | Vmn2r29   | 0.177   | 0.169491525 | -2.560714954 |
| Wscd2 (NC | 0.013    | Wscd2 (NC | 0.077   | 0.168831169 | -2.566346823 |
| Frmd5     | 6.14E-03 | Frmd5     | 0.037   | 0.166027027 | -2.590509982 |
| Rasef     | 4.98E-03 | Rasef     | 0.03    | 0.165933333 | -2.591324365 |
| Zcchc18   | 7.76E-03 | Zcchc18   | 0.047   | 0.165       | -2.59946207  |
| Ccdc112   | 9.21E-03 | Ccdc112   | 0.056   | 0.164482143 | -2.60399713  |
| Rasl11a   | 0.023    | Rasl11a   | 0.14    | 0.164285714 | -2.605721061 |
| Gm3837    | 0.05     | Gm3837    | 0.305   | 0.163934426 | -2.608809243 |
| Fam132b   | 9.17E-03 | Fam132b   | 0.056   | 0.163660714 | -2.611220041 |
| Accn1     | 6.81E-03 | Accn1     | 0.042   | 0.162119048 | -2.62487449  |
| Ap1m2     | 0.03     | Ap1m2     | 0.192   | 0.15625     | -2.678071905 |
| Rpl30     | 18.909   | Rpl30     | 122.154 | 0.154796405 | -2.691556133 |
| Prtn3     | 0.053    | Prtn3     | 0.344   | 0.154069767 | -2.6983443   |
| Ugt1a7c   | 0.039    | Ugt1a7c   | 0.257   | 0.151750973 | -2.72022233  |
| Actl6b    | 0.017    | Actl6b    | 0.114   | 0.149122807 | -2.745427173 |
| Gm10681   | 0.015    | Gm10681   | 0.101   | 0.148514851 | -2.751320887 |
| Ly6d      | 0.672    | Ly6d      | 4.556   | 0.147497805 | -2.761234609 |
| Fam19a1   | 7.93E-03 | Fam19a1   | 0.054   | 0.146925926 | -2.766839105 |
| Mme       | 0.572    | Mme       | 3.94    | 0.145177665 | -2.784108578 |
| A1bg      | 0.014    | A1bg      | 0.097   | 0.144329897 | -2.79255792  |
| Ccdc64b   | 0.013    | Ccdc64b   | 0.092   | 0.141304348 | -2.823122238 |
| Slc26a3   | 0.039    | Slc26a3   | 0.277   | 0.140794224 | -2.828339947 |
| Fut2      | 0.018    | Fut2      | 0.13    | 0.138461538 | -2.852442812 |
| Mug2      | 14.53    | Mug2      | 109.538 | 0.132648031 | -2.914324836 |
| Orm2      | 6.033    | Orm2      | 46.241  | 0.130468632 | -2.93822511  |
| Kcnj15    | 4.96E-03 | Kcnj15    | 0.038   | 0.130421053 | -2.938751326 |
| Gng3      | 0.015    | Gng3      | 0.116   | 0.129310345 | -2.9510904   |
| Muc1      | 0.208    | Muc1      | 1.637   | 0.127061698 | -2.976398888 |
| Cyp2c69   | 0.102    | Cyp2c69   | 0.823   | 0.123936817 | -3.012323278 |
| Vtcn1     | 0.128    | Vtcn1     | 1.058   | 0.120982987 | -3.047123912 |
| Kl        | 5.04E-03 | Kl        | 0.042   | 0.12002381  | -3.058607468 |
| Rhox13    | 0.021    | Rhox13    | 0.188   | 0.111702128 | -3.162271429 |
| Bcat1     | 3.18E-03 | Bcat1     | 0.029   | 0.109793103 | -3.187140659 |
| Fgl1      | 44.736   | Fgl1      | 425.089 | 0.105239138 | -3.248256756 |
| Abcc12    | 0.011    | Abcc12    | 0.105   | 0.104761905 | -3.254813899 |
| Apod      | 0.014    | Apod      | 0.137   | 0.102189781 | -3.290677161 |
| Cyp4a14   | 6.329    | Cyp4a14   | 62.048  | 0.102001676 | -3.293335236 |
| Cdh18     | 0.075    | Cdh18     | 0.746   | 0.100536193 | -3.31421313  |
| Tff2      | 0.045    | Tff2      | 0.448   | 0.100446429 | -3.315501826 |

|           |          |           |          |             |              |
|-----------|----------|-----------|----------|-------------|--------------|
| Cxcl5     | 0.047    | Cxcl5     | 0.476    | 0.098739496 | -3.340228912 |
| Gdpd3     | 0.362    | Gdpd3     | 3.685    | 0.098236092 | -3.347603017 |
| Selenbp2  | 66.655   | Selenbp2  | 686.987  | 0.097025126 | -3.365497793 |
| Rpl3      | 9.839    | Rpl3      | 104.755  | 0.093923918 | -3.412363603 |
| LOC100861 | 0.029    | LOC100861 | 0.315    | 0.092063492 | -3.441227023 |
| Gucy2c    | 0.02     | Gucy2c    | 0.22     | 0.090909091 | -3.459431619 |
| Gm4450    | 0.028    | Gm4450    | 0.319    | 0.087774295 | -3.510057692 |
| Rad51l1   | 0.118    | Rad51l1   | 1.463    | 0.080656186 | -3.632071005 |
| Gm7068    | 0.018    | Gm7068    | 0.233    | 0.077253219 | -3.694261143 |
| Alox15    | 0.011    | Alox15    | 0.147    | 0.074829932 | -3.740240726 |
| B3gat2    | 0.03     | B3gat2    | 0.401    | 0.074812968 | -3.740567831 |
| Inpp5j    | 7.43E-03 | Inpp5j    | 0.102    | 0.072833333 | -3.779257316 |
| Mmp7      | 0.059    | Mmp7      | 0.896    | 0.065848214 | -3.924711873 |
| Gm5093    | 0.043    | Gm5093    | 0.659    | 0.065250379 | -3.9378699   |
| Myo1a     | 7.70E-03 | Myo1a     | 0.123    | 0.062560976 | -3.998593179 |
| Tmem54    | 0.022    | Tmem54    | 0.354    | 0.062146893 | -4.008173931 |
| Parm1     | 0.012    | Parm1     | 0.197    | 0.060913706 | -4.037089319 |
| Gabrp     | 0.016    | Gabrp     | 0.264    | 0.060606061 | -4.044394119 |
| Car9      | 0.04     | Car9      | 0.673    | 0.059435364 | -4.0725346   |
| Rps3a     | 10.369   | Rps3a     | 180.631  | 0.057404322 | -4.12269684  |
| S100g     | 0.054    | S100g     | 0.984    | 0.054878049 | -4.187627003 |
| Lcn2      | 2.269    | Lcn2      | 42.812   | 0.052999159 | -4.23788672  |
| Gm9241    | 0.077    | Gm9241    | 1.483    | 0.05192178  | -4.267516342 |
| Actg2     | 0.039    | Actg2     | 0.988    | 0.039473684 | -4.662965013 |
| Myo7b     | 3.92E-03 | Myo7b     | 0.116    | 0.03375     | -4.888968688 |
| Ren1      | 0.036    | Ren1      | 1.079    | 0.033364226 | -4.905554148 |
| Nlrp12    | 0.113    | Nlrp12    | 3.959    | 0.028542561 | -5.13074139  |
| Ltf       | 9.41E-03 | Ltf       | 0.387    | 0.024312661 | -5.362148356 |
| Saa1      | 32.219   | Saa1      | 1673.883 | 0.01924806  | -5.699143164 |
| Serpina3c | 0.214    | Serpina3c | 11.608   | 0.018435562 | -5.761364818 |
| Clec2h    | 0.024    | Clec2h    | 1.412    | 0.016997167 | -5.878561873 |
| Tpo       | 7.86E-03 | Tpo       | 0.522    | 0.015059387 | -6.053193147 |
| Saa2      | 10.532   | Saa2      | 1049.826 | 0.010032139 | -6.639226996 |
| Ctse      | 0.024    | Ctse      | 5.55     | 0.004324324 | -7.853309555 |
| Mtdh      | 0.021    | Mtdh      | 12.672   | 0.001657197 | -9.237039197 |
| Dmbt1     | 0.017    | Dmbt1     | 14.249   | 0.001193066 | -9.711110212 |
