# Supplementary material
Source: PubMed Central journal article supplement (PMC4216744)
Supplement: NIHMS625826-supplement-7.pdf [file NIHMS625826-supplement-7.pdf]

**Table S7. List of antibodies****For Western blot analysis**

| <b>Serial No.</b> | <b>Protein</b>                       | <b>Source</b>  | <b>Host</b> | <b>Dilution</b> |
|-------------------|--------------------------------------|----------------|-------------|-----------------|
| 1                 | EGFR                                 | Cell Signaling | Rabbit      | 1000            |
| 2                 | phospho-EGFR Y1068                   | Cell Signaling | Rabbit      | 800             |
| 3                 | AKT                                  | Cell Signaling | Rabbit      | 1000            |
| 4                 | phospho-AKT S473                     | Cell Signaling | Rabbit      | 1000            |
| 5                 | ERK1/2                               | Cell Signaling | Rabbit      | 1000            |
| 6                 | phospho-ERK1/2                       | Cell Signaling | Rabbit      | 1000            |
| 7                 | $\beta$ -catenin                     | Cell Signaling | Rabbit      | 1000            |
| 8                 | phospho- $\beta$ -catenin S33/37/T41 | Cell Signaling | Rabbit      | 1000            |
| 9                 | p-STAT3                              | Cell Signaling | Rabbit      | 1000            |
| 10                | STAT3                                | Cell Signaling | Mouse       | 1000            |
| 11                | p-p65 NF- $\kappa$ B                 | Cell Signaling | Rabbit      | 1000            |
| 12                | p65 NF- $\kappa$ B                   | Cell Signaling | Rabbit      | 1000            |
| 13                | GAPDH                                | Santa Cruz     | Mouse       | 250             |

**For IHC**

| <b>Serial No.</b> | <b>Protein</b>     | <b>Source</b>  | <b>Host</b> | <b>Dilution</b> |
|-------------------|--------------------|----------------|-------------|-----------------|
| 1                 | F4/80              | AbD Serotec    | Rat         | 300             |
| 2                 | AEG-1              | In-house       | Rabbit      | 400             |
| 3                 | AFP                | Santa Cruz     | Rabbit      | 500             |
| 4                 | STAT3              | Cell Signaling | Mouse       | 200             |
| 5                 | p65 NF- $\kappa$ B | Cell Signaling | Rabbit      | 200             |
| 6                 | $\alpha$ -SMA      | Sigma          | Mouse       | 100             |
| 7                 | Ly6G               | Abcam          | Rat         | 100             |

**For IF**

| <b>Serial No.</b> | <b>Protein</b>     | <b>Source</b>  | <b>Host</b> | <b>Dilution</b> |
|-------------------|--------------------|----------------|-------------|-----------------|
| <b>1</b>          | F4/80              | AbD Serotec    | Rat         | 100             |
| <b>2</b>          | AEG-1              | In-house       | Chicken     | 400             |
| <b>3</b>          | p65 NF- $\kappa$ B | Cell Signaling | Rabbit      | 50              |
