# Supplementary material
Source: PubMed Central journal article supplement (PMC4216744)
Supplement: NIHMS625826-supplement-8.pdf [file NIHMS625826-supplement-8.pdf]

Robertson et al. Fig. S1

A.

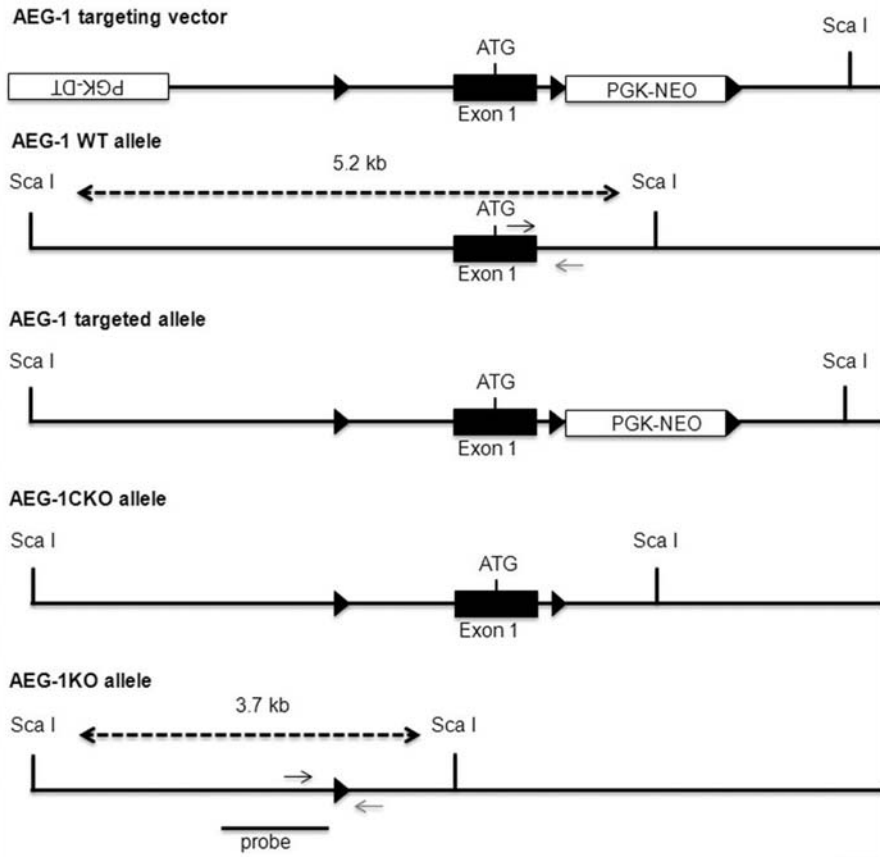

B.

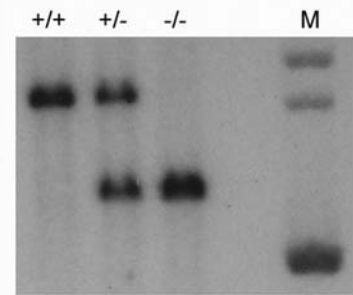

E.

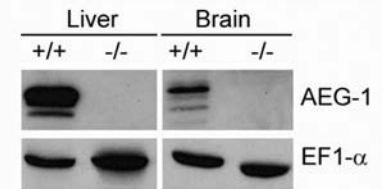

C.

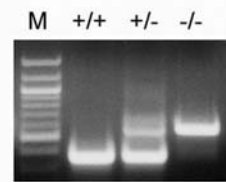

D.

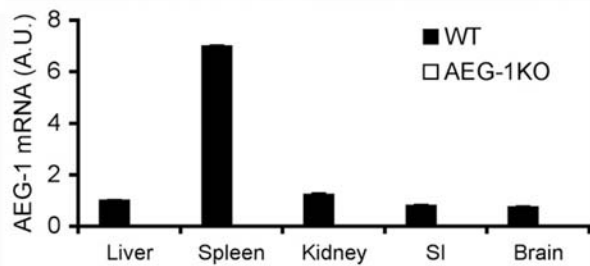

F.

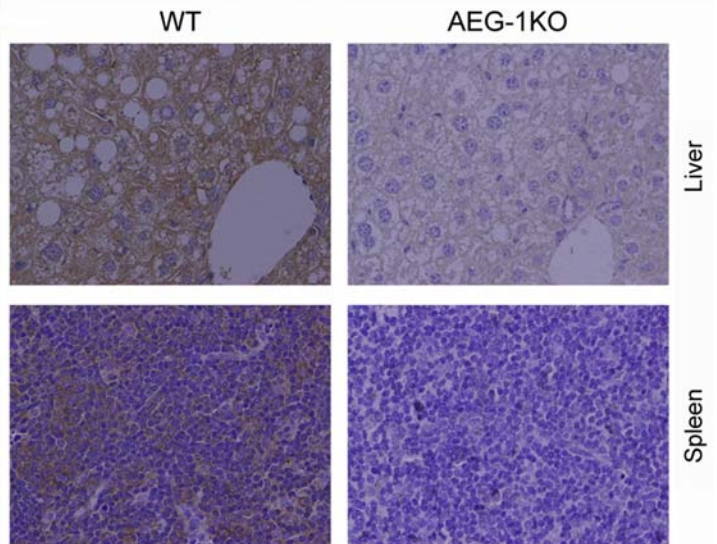

Robertson et al. Fig. S2

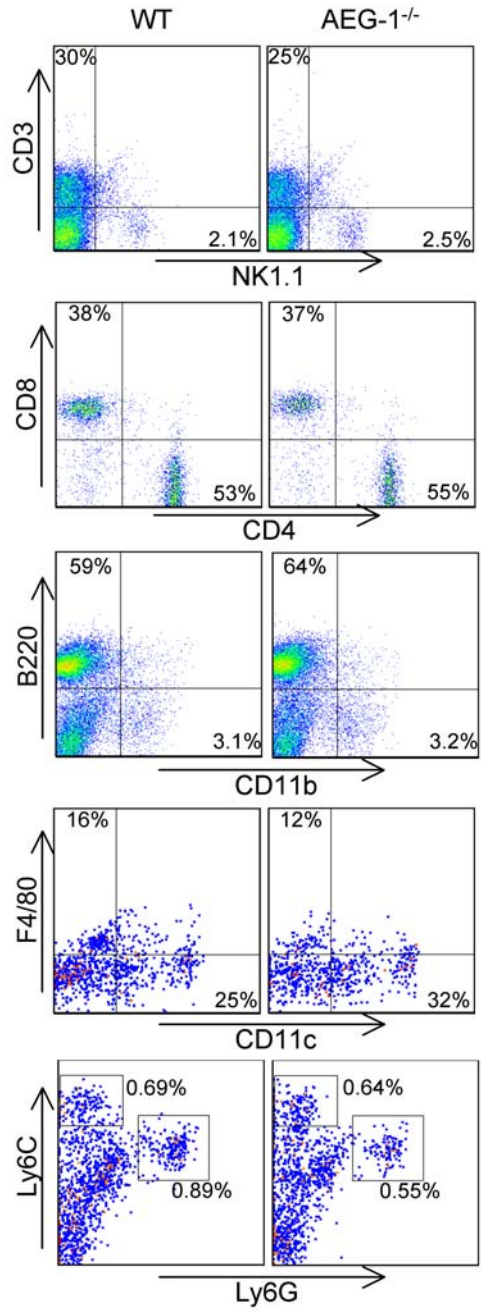

Robertson et al. Fig. S3

WT

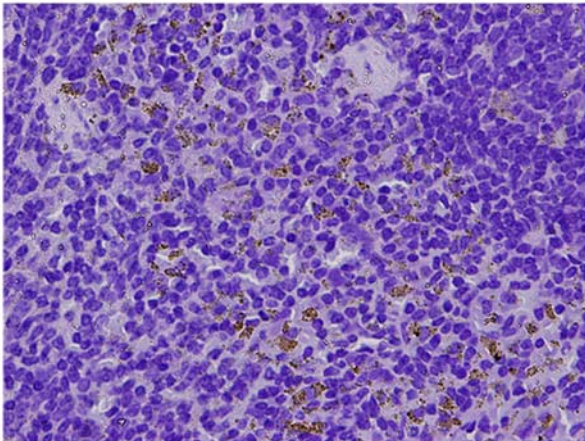

AEG-1KO

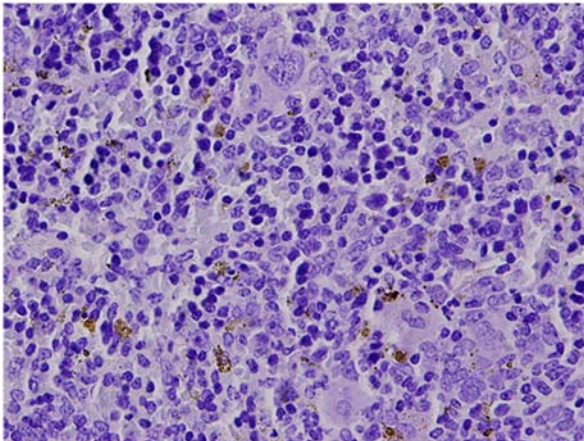

F4/80 staining in aged spleen (16 m old)

Robertson et al. Fig. S4

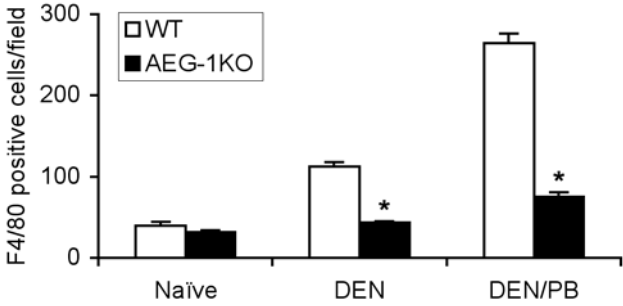

Robertson et al. Fig. S5

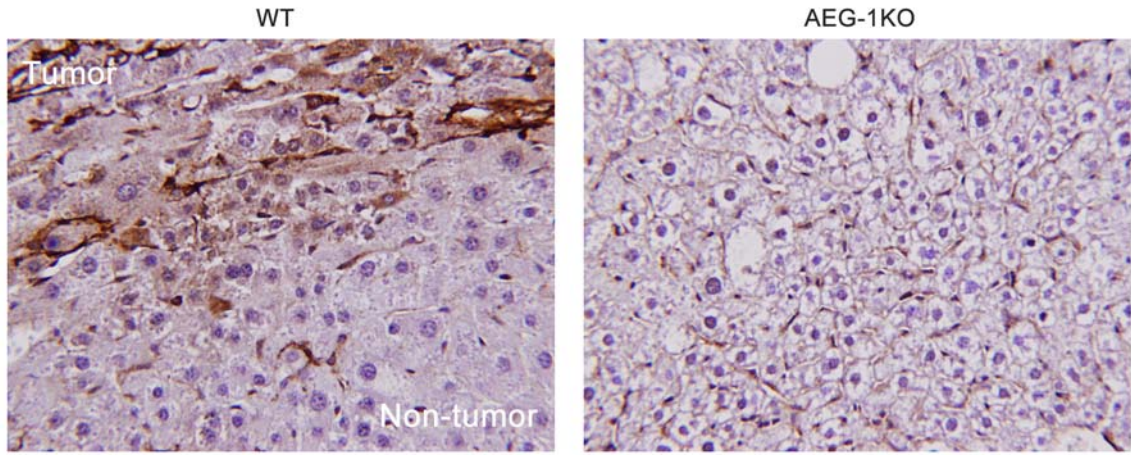

$\alpha$ -SMA staining in WT liver showing tumor and non-tumor region and AEG-1KO liver
